# Supplementary material for: Tetraose steroidal glycoalkaloids from potato provide resistance against Alternaria solani and Colorado potato beetle
Source: bioRxiv preprint, doi:10.1101/2022.09.28.509958, version 4 (2023-06-29)
Supplement: S1Table [file 509958_file08.xlsx]

## Sheet: Sheet1
CGN* accession nr.	Botanical name	Origin country	Number of genotypes tested
CGN17988	Solanum commersonii	Argentina	3
CGN18024	Solanum commersonii	Argentina	3
CGN18025	Solanum malmeanum	Argentina	3
CGN18026	Solanum commersonii	Argentina	3
CGN18027	Solanum commersonii	Argentina	3
CGN18215	Solanum malmeanum	Argentina	3
CGN18328	Solanum commersonii	?	3
CGN18329	Solanum malmeanum	Uruguay	3
CGN21353	Solanum malmeanum	Argentina	2
CGN21359	Solanum commersonii	Argentina	3
CGN22352	Solanum malmeanum	Argentina	2
CGN23491	Solanum commersonii	Argentina	3
CGN23492	Solanum commersonii	Argentina	3
*Centre for Genetic Resources, the Netherlands (WUR)
